# Supplementary material for: Tautomeric Equilibrium of an Asymmetric β-Diketone in Halogen-Bonded Cocrystals with Perfluorinated Iodobenzenes
Source: MDPI journal article supplement (doi:10.3390/cryst11060699), 2021-06-18
Supplement: s1 [file s1]

## Article

# Tautomeric Equilibrium of an Asymmetric $\beta$ -Diketone in Halogen-Bonded Cocrystals with Perfluorinated Iodobenzenes

Valentina Martinez <sup>1,2</sup>, Nikola Bedeković <sup>1</sup>, Vladimir Stilinović <sup>1,\*</sup> and Dominik Cinčić <sup>1,\*</sup>

<sup>1</sup> Department of Chemistry, Faculty of Science, University of Zagreb, Horvatovac 102A, 10 000 Zagreb, Croatia; vmartin@irb.hr (V.M.); nbedekovic@chem.pmf.hr (N.B.)

<sup>2</sup> Ruđer Bošković Institute, Bijenička cesta 54, 10 000 Zagreb, Croatia

\* Correspondence: vstalinovic@chem.pmf.hr (V.S.); dominik@chem.pmf.hr (D.C.); Tel.: +385-1-4606-371 (V.S.); +385-1-4606-362 (D.C.)

## 1. Figure S1–S29

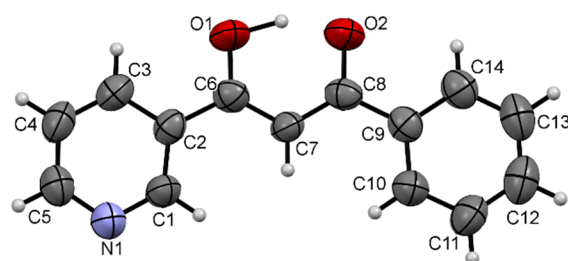

**Figure S1.** Molecular structure of **b3pm** showing the atom-labelling scheme. Displacement ellipsoids are drawn at the 50 % probability level, and H atoms are shown as small spheres of arbitrary radius.

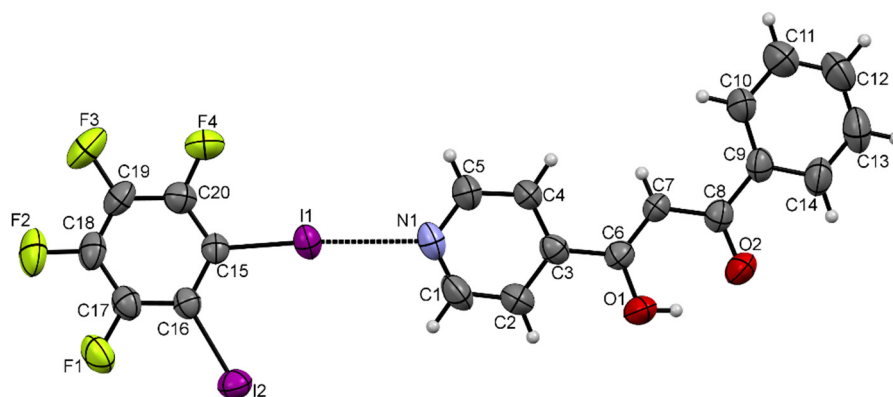

**Figure S2.** Molecular structure of **(b4pm)(13tfib)** showing the atom-labelling scheme. Displacement ellipsoids are drawn at the 50 % probability level, and H atoms are shown as small spheres of arbitrary radius.

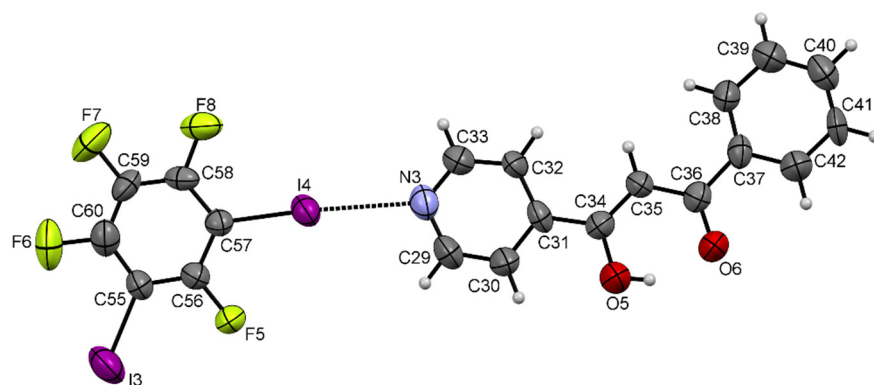

**Figure S3.** Molecular structure of **(b4pm)(13tfib)** showing the atom-labelling scheme. Displacement ellipsoids are drawn at the 50 % probability level, and H atoms are shown as small spheres of arbitrary radius.

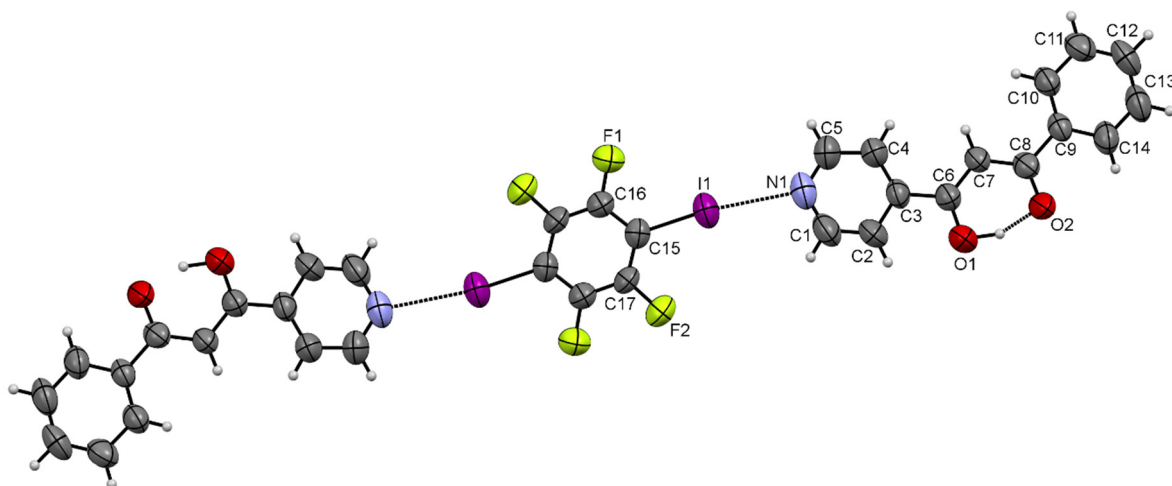

**Figure S4.** Molecular structure of **(b4pm)<sub>2</sub>(14tfib)** showing the atom-labelling scheme. Displacement ellipsoids are drawn at the 50 % probability level, and H atoms are shown as small spheres of arbitrary radius.

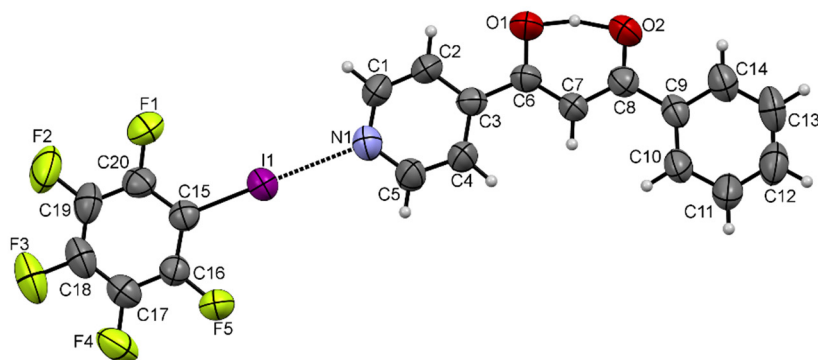

**Figure S5.** Molecular structure of **(b4pm)(ipfb)** showing the atom-labelling scheme. Displacement ellipsoids are drawn at the 50 % probability level, and H atoms are shown as small spheres of arbitrary radius.

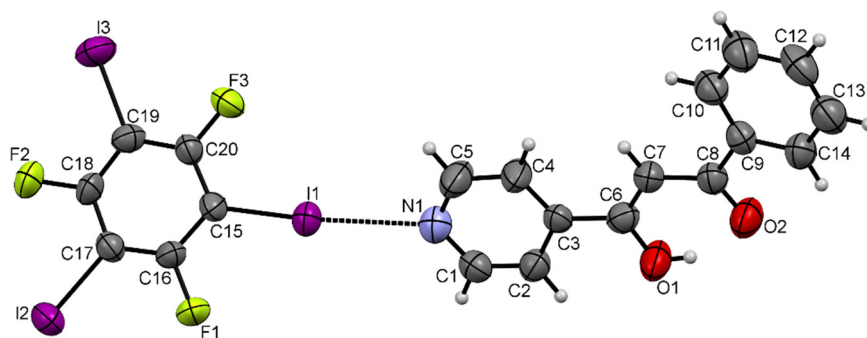

**Figure S6.** Molecular structure of **(b4pm)(135tfib)** showing the atom-labelling scheme. Displacement ellipsoids are drawn at the 50 % probability level, and H atoms are shown as small spheres of arbitrary radius.

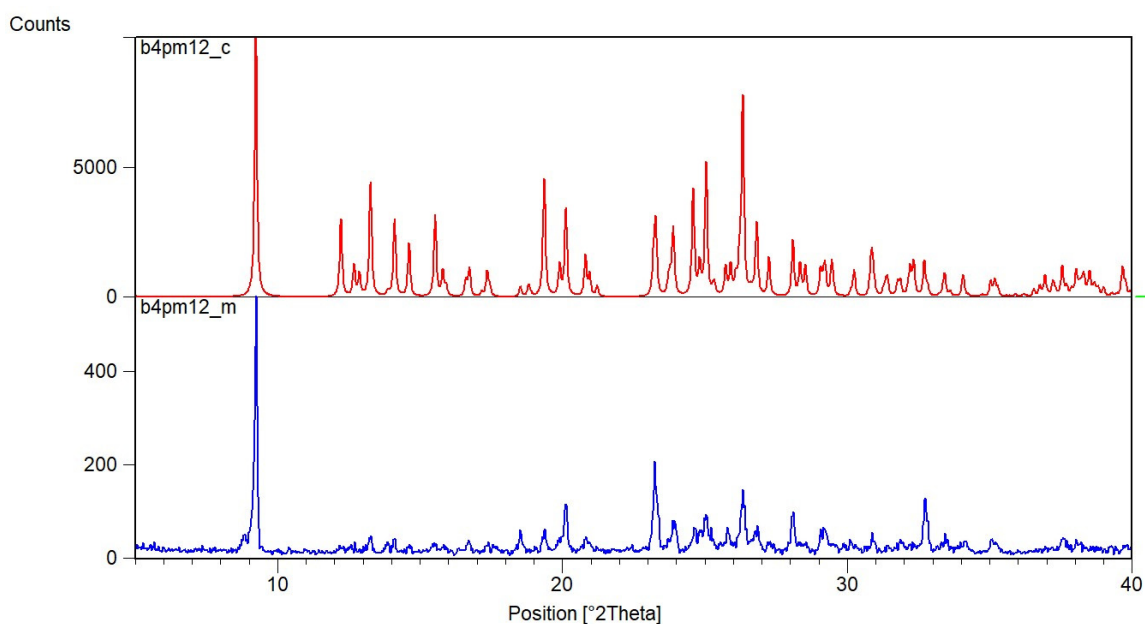

**Figure S7.** Measured (blue) and calculated (red) PXRD patterns of **(b4pm)(12tfib)**.

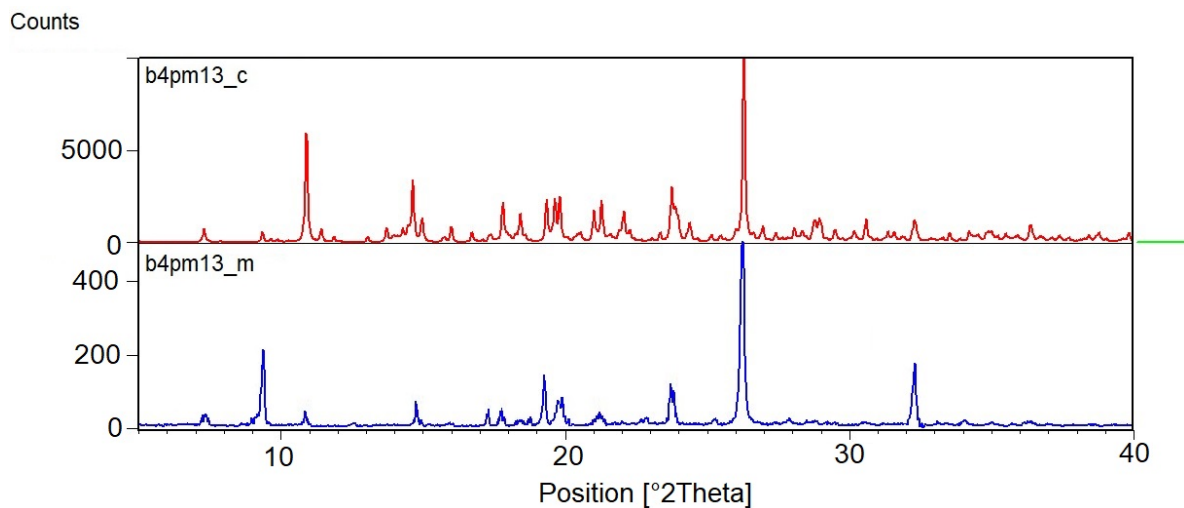

**Figure S8.** Measured (blue) and calculated (red) PXRD patterns of **(b4pm)(13tfib)**.

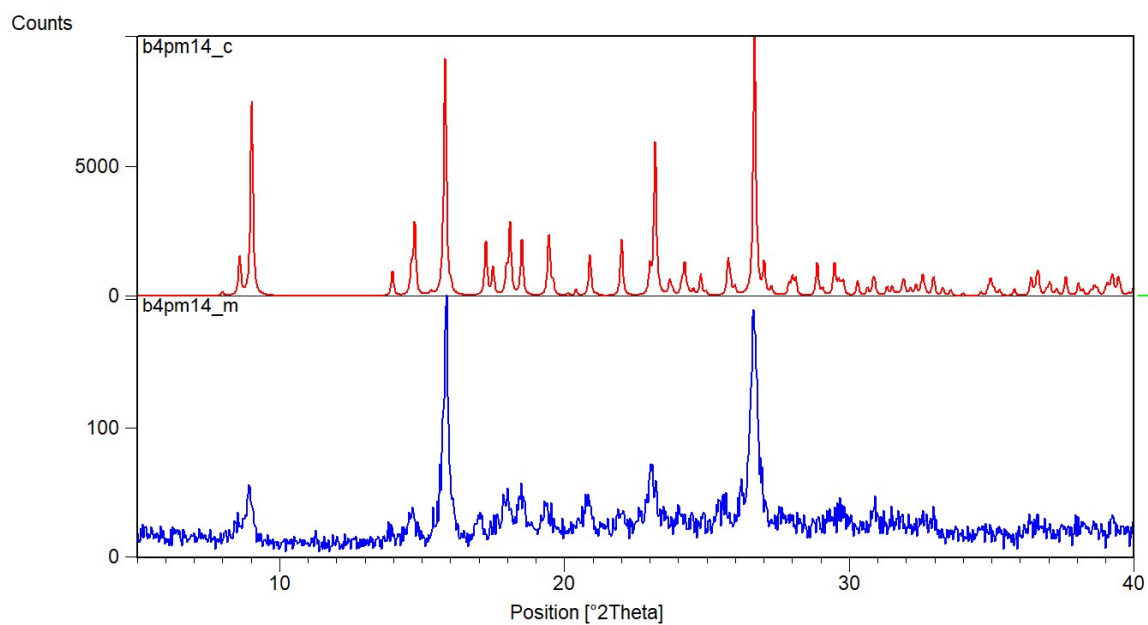

**Figure S9.** Measured (blue) and calculated (red) PXRD patterns of  $(b4pm)_2(14tfib)$ .

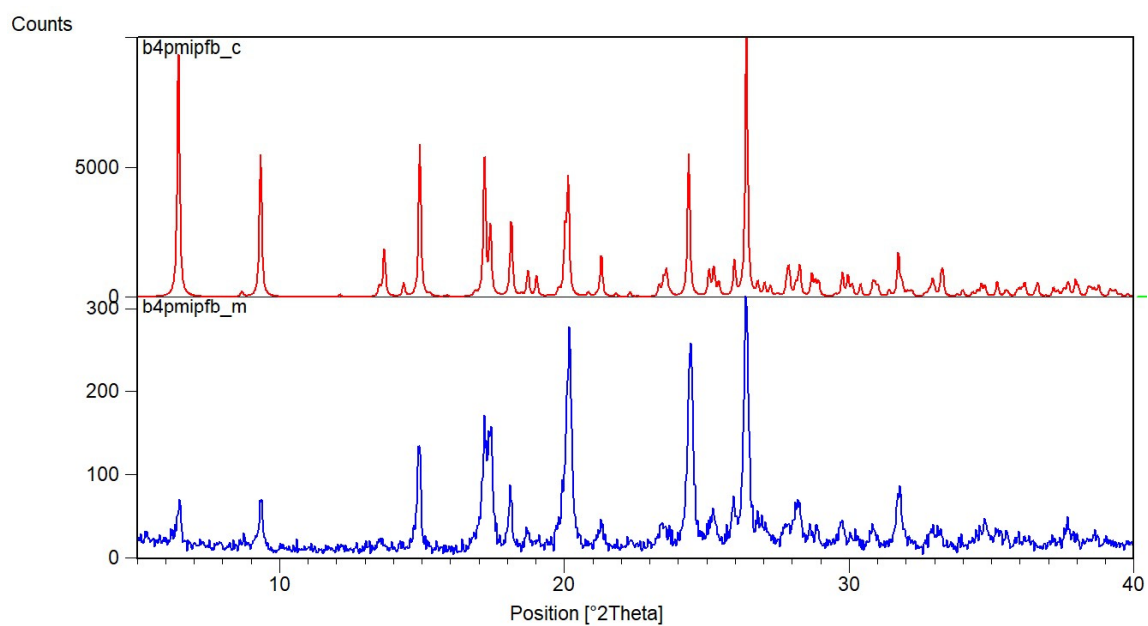

**Figure S10.** Measured (blue) and calculated (red) PXRD patterns of  $(b4pm)(ipfb)$ .

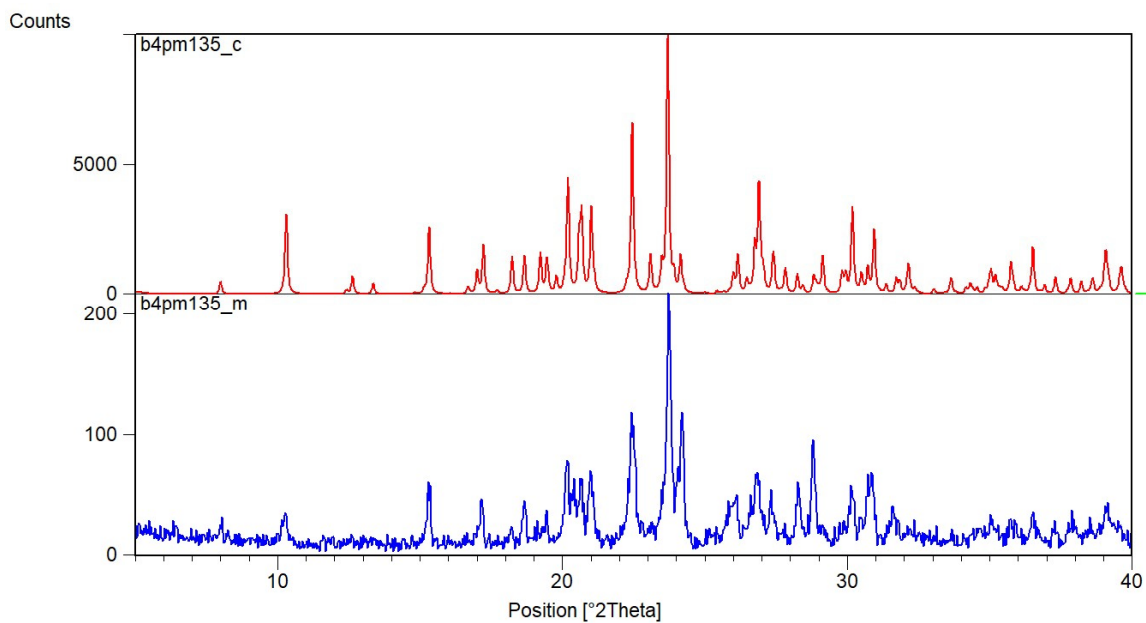

Figure S11. Measured (blue) and calculated (red) PXR D patterns of (b4pm)(135tfib).

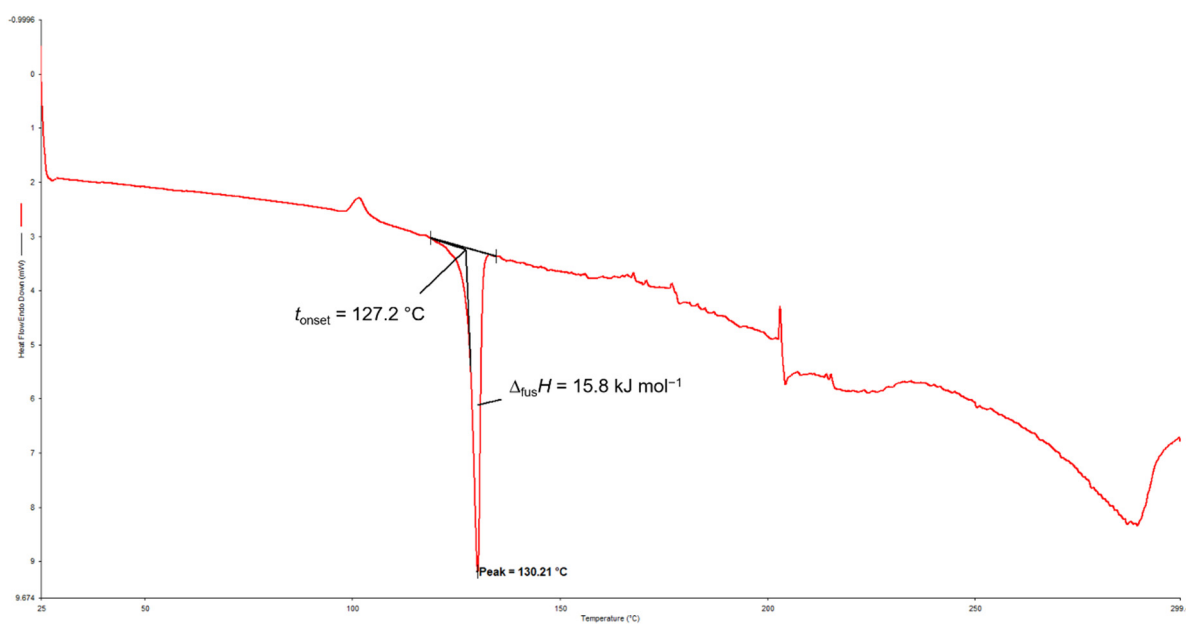

Figure S12. DSC thermogram of (b3pm).

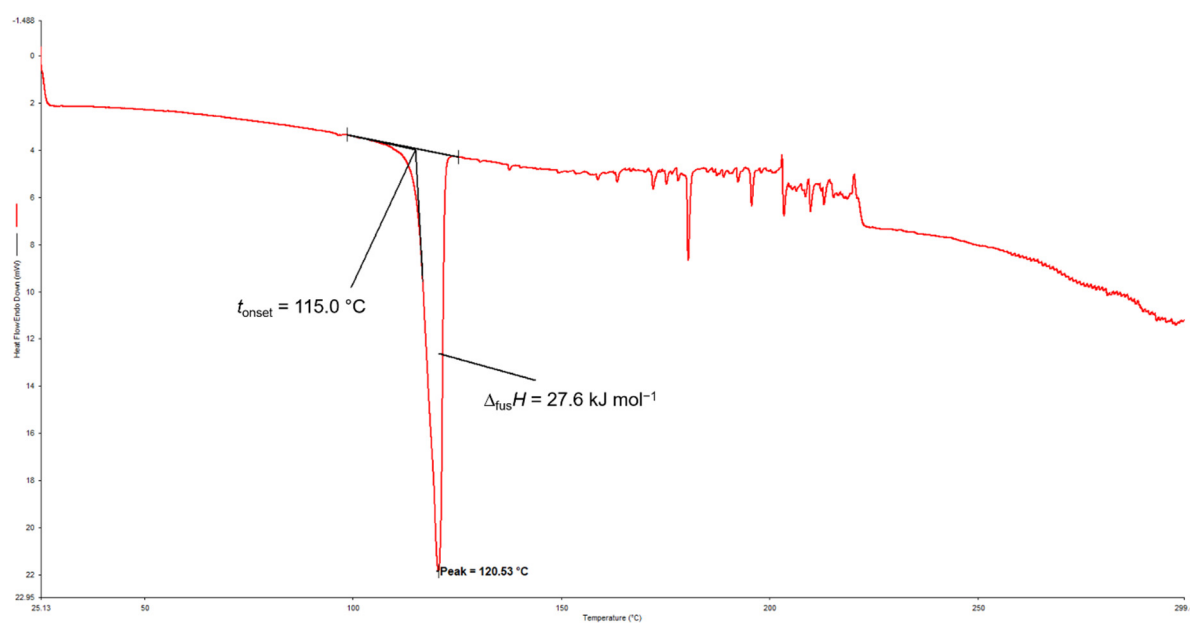

Figure S13. DSC thermogram of (b4pm).

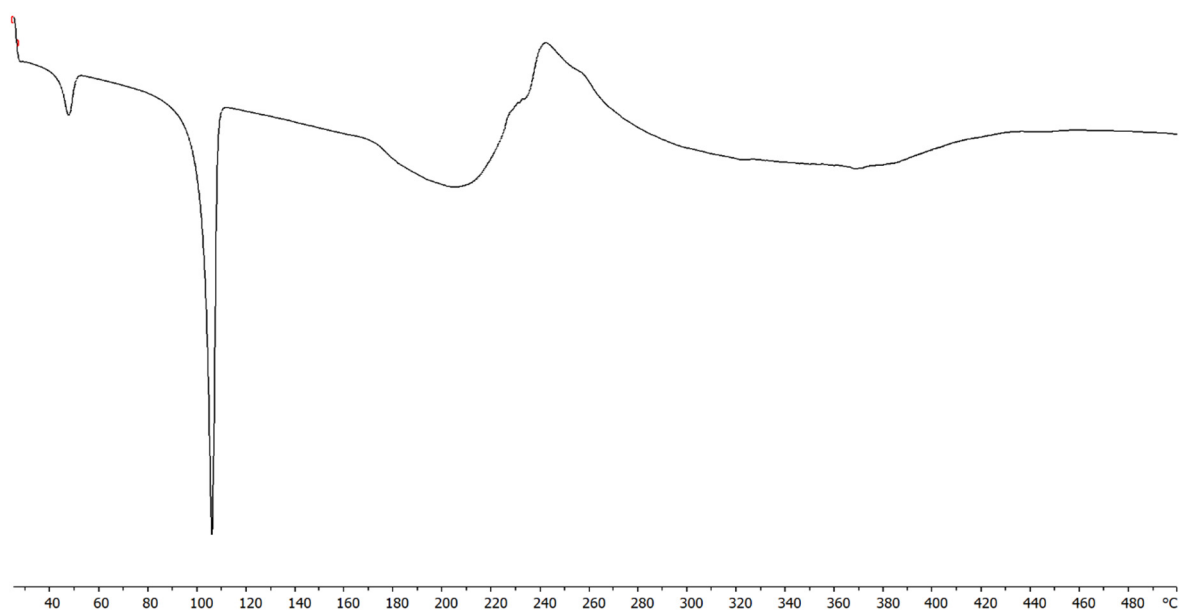

Figure S14. DSC thermogram of (b4pm)(12tfib).

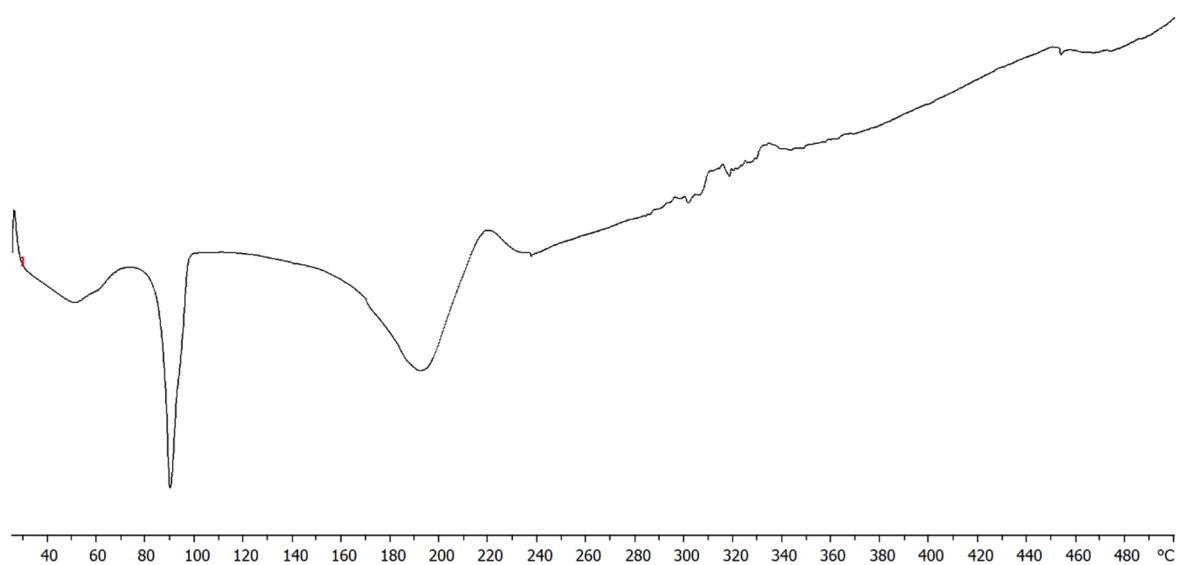

Figure S15. DSC thermogram of (b4pm)(13tfib).

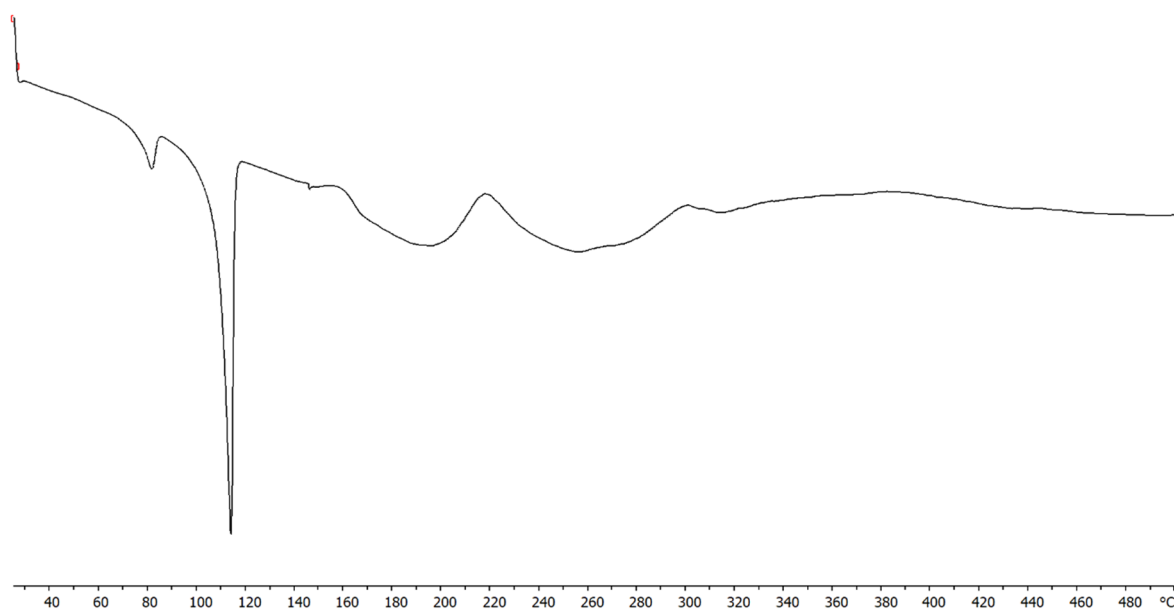

Figure S16. DSC thermogram of (b4pm)<sub>2</sub>(14tfib).

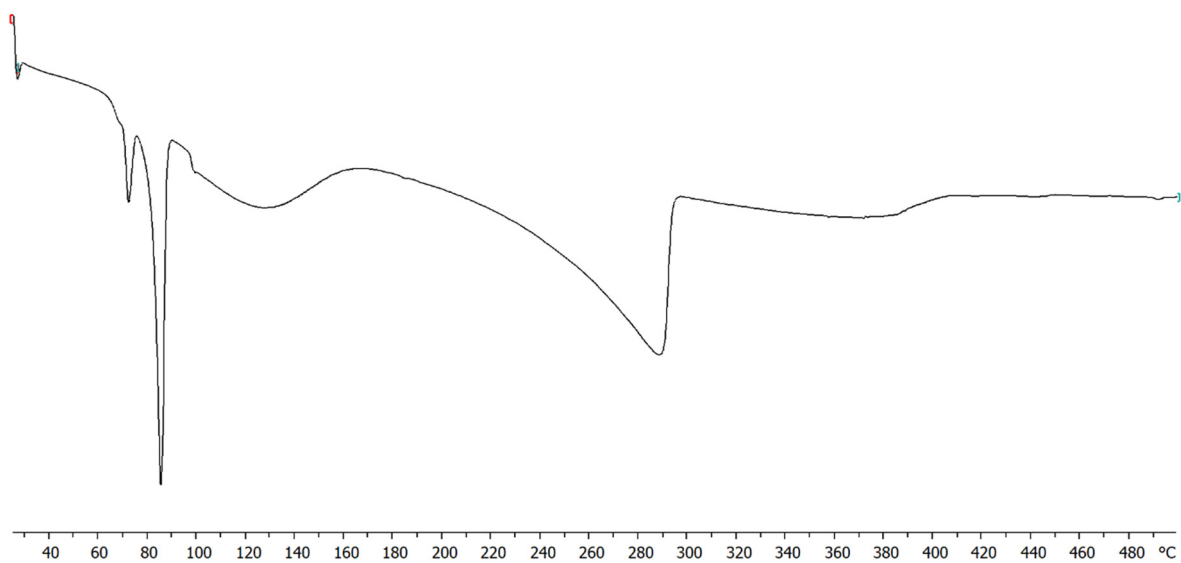

Figure S17. DSC thermogram of (b4pm)(ipfb).

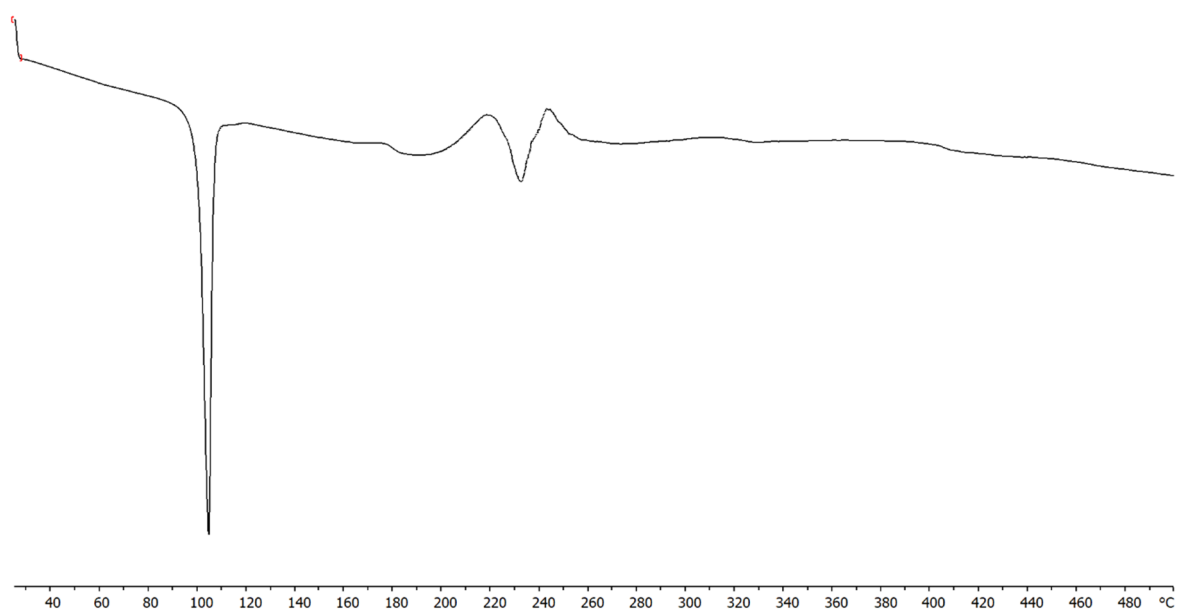

Figure S18. DSC thermogram of (b4pm)(135tfib).



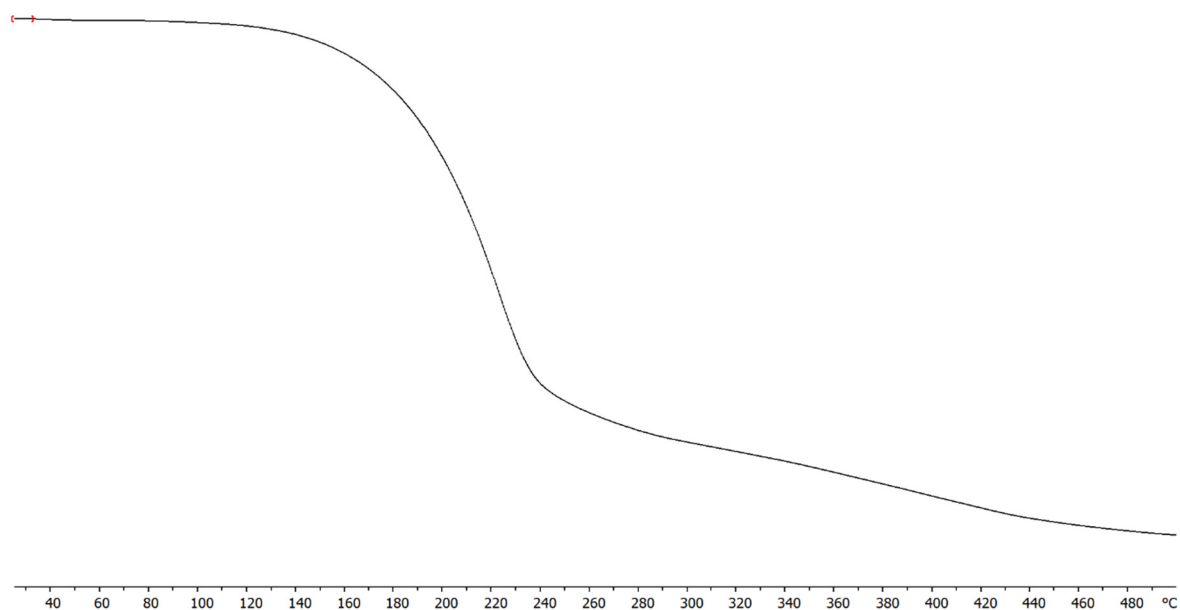

**Figure S19.** TG curve of (b4pm)(12tfib).

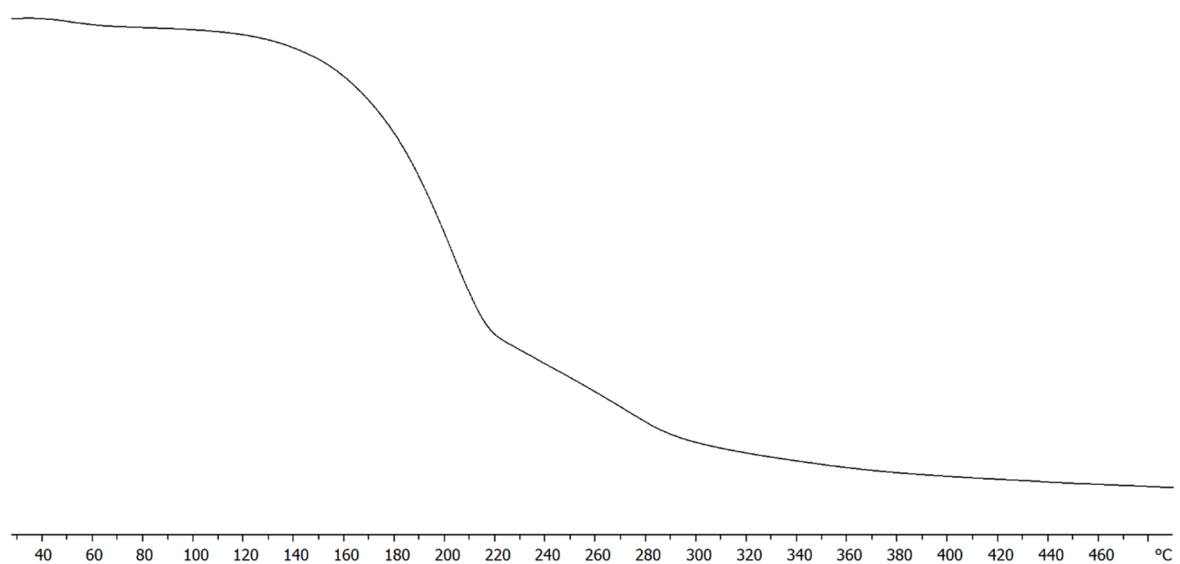

**Figure S20.** TG curve of (b4pm)(13tfib).

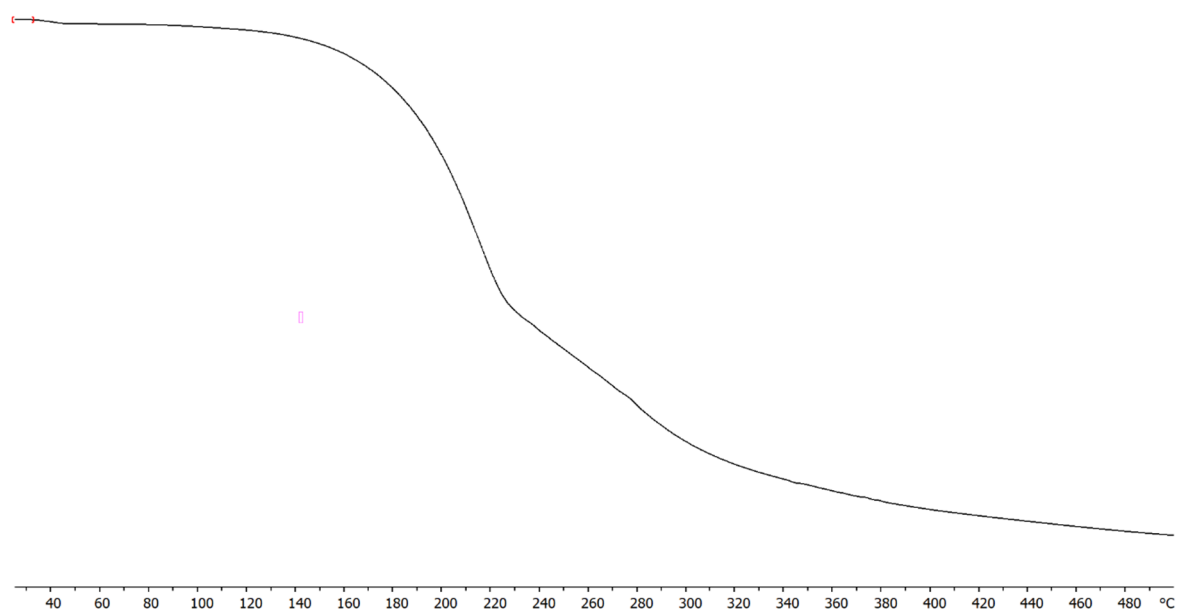

**Figure S21.** TG curve of (b4pm)<sub>2</sub>(14tfib).

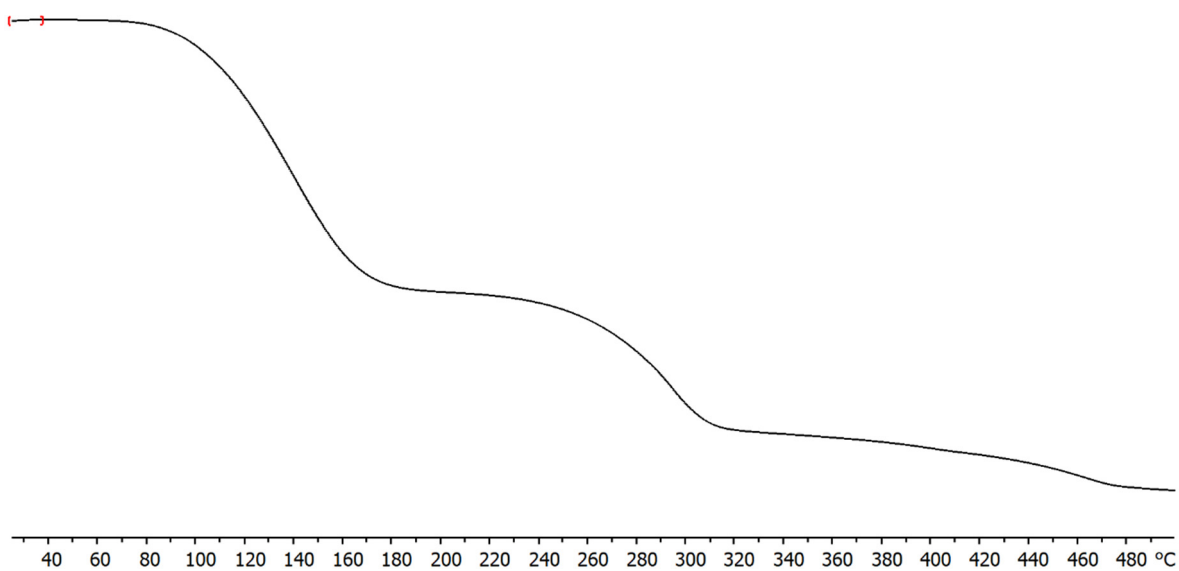

**Figure S22.** TG curve of (b4pm)(ipfb).

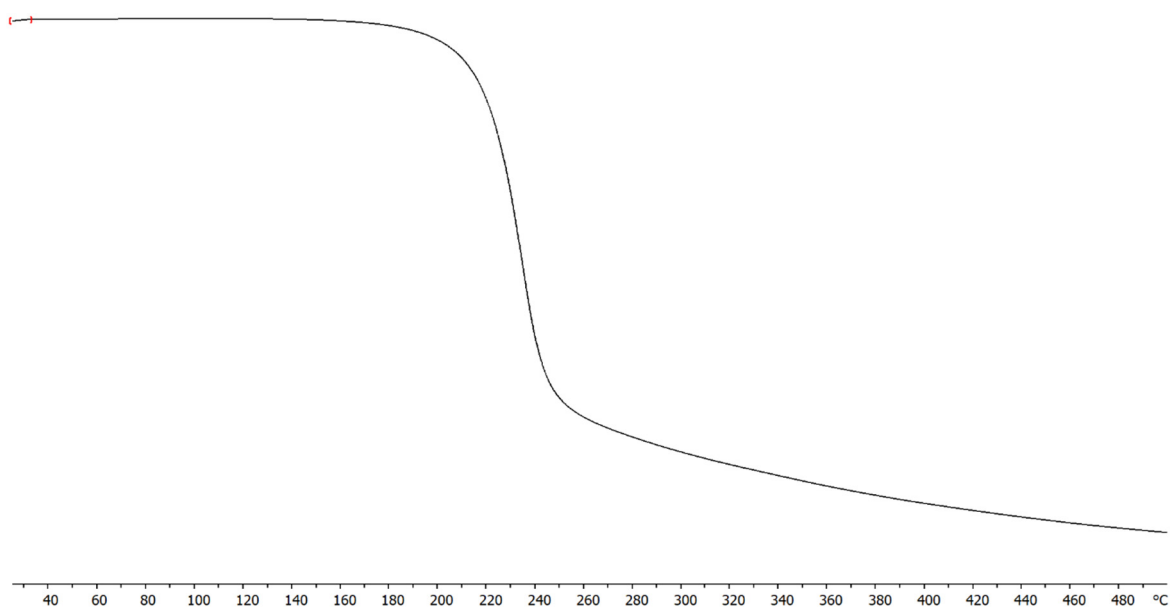

Figure S23. TG curve of (b4pm)(135tfib).

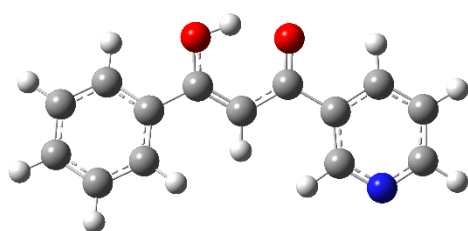

Figure S24. Optimized structure of *anti*-b3pm.

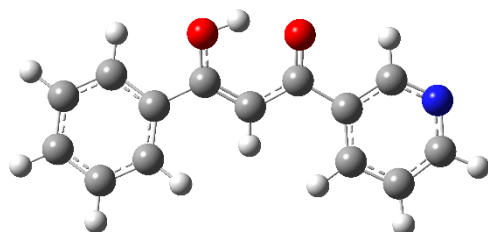

Figure S25. Optimized structure of *syn*-b3pm.

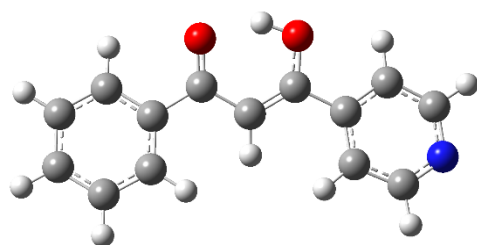

Figure S26. Optimized structure of b4pm.

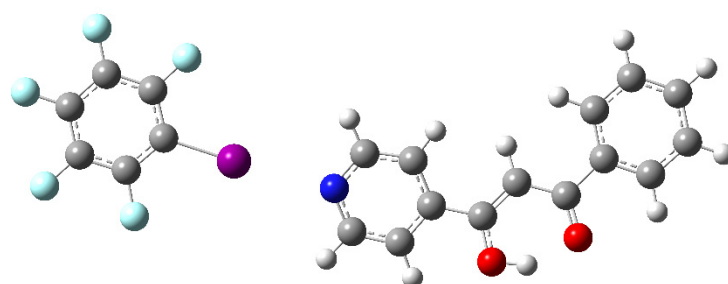Figure S27. Optimized structure of (b4pm)(ipfb)<sub>N</sub>.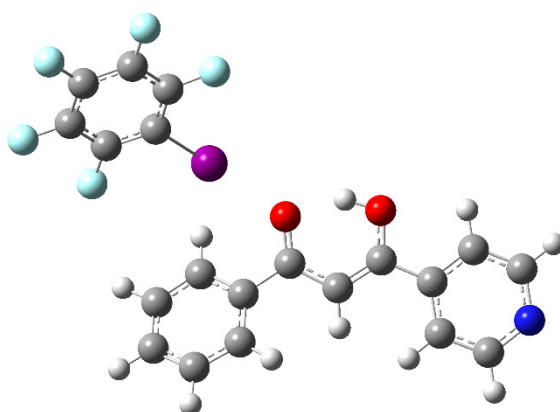Figure S28. Optimized structure of (b4pm)(ipfb)<sub>O</sub>.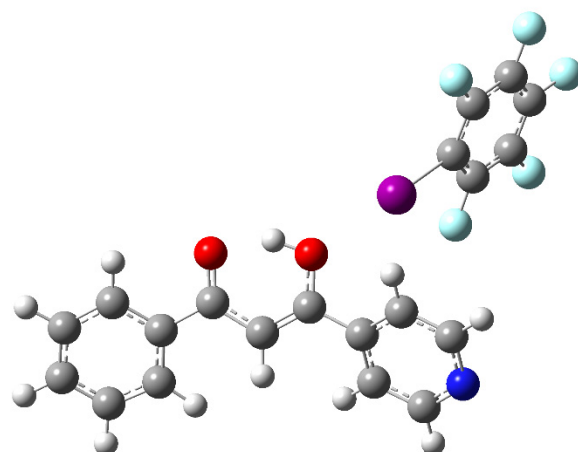Figure S29. Optimized structure of (b4pm)(ipfb)<sub>OH</sub>.

## 2. Table S1–S4

Table S1. An overview and crystallographic data of the prepared compounds.

|                      | <b>b3pm</b>                                           | <b>(b4pm)(12tfib)</b>                                                         | <b>(b4pm)(13tfib)</b>                                                         |
|----------------------|-------------------------------------------------------|-------------------------------------------------------------------------------|-------------------------------------------------------------------------------|
| Molecular formula    | C <sub>14</sub> H <sub>11</sub> NO <sub>2</sub>       | C <sub>20</sub> H <sub>11</sub> NO <sub>2</sub> I <sub>2</sub> F <sub>4</sub> | C <sub>20</sub> H <sub>11</sub> NO <sub>2</sub> I <sub>2</sub> F <sub>4</sub> |
| <i>M<sub>r</sub></i> | 225.24                                                | 627.11                                                                        | 627.11                                                                        |
| Crystal system       | orthorhombic                                          | triclinic                                                                     | triclinic                                                                     |
| Space group          | <i>P</i> 2 <sub>1</sub> 2 <sub>1</sub> 2 <sub>1</sub> | <i>P</i> -1                                                                   | <i>P</i> -1                                                                   |
| <i>a</i> / Å         | 3.9563(6)                                             | 7.1884(3)                                                                     | 13.1561(12)                                                                   |
| <i>b</i> / Å         | 16.7245(21)                                           | 7.6487(3)                                                                     | 13.2886(13)                                                                   |
| <i>c</i> / Å         | 16.9608(24)                                           | 19.5677(7)                                                                    | 19.2683(19)                                                                   |

|                                                                        |                    |                    |                      |
|------------------------------------------------------------------------|--------------------|--------------------|----------------------|
| $\alpha / ^\circ$                                                      | 90                 | 81.468(3)          | 104.524(9)           |
| $\beta / ^\circ$                                                       | 90                 | 80.454(3)          | 95.406(8)            |
| $\gamma / ^\circ$                                                      | 90                 | 78.710(4)          | 107.822(8)           |
| $V / \text{\AA}^3$                                                     | 1122.25(3)         | 1032.94(10)        | 3050.58(145)         |
| $Z$                                                                    | 4                  | 2                  | 2                    |
| $\rho_{\text{calc}} / \text{g cm}^{-3}$                                | 1.33               | 2.02               | 2.05                 |
| $T / \text{K}$                                                         | 295                | 295                | 295                  |
| Crystal size / $\text{mm}^3$                                           | 0.38 x 0.34 x 0.26 | 0.48 x 0.44 x 0.26 | 0.30 x 0.19 x 0.10   |
| $\mu / \text{mm}^{-1}$                                                 | 0.090              | 3.096              | 3.144                |
| $F(000)$                                                               | 472.0              | 592.0              | 1772.0               |
| Refl. collected/unique parameters                                      | 11466/1973<br>158  | 9605 / 5907<br>267 | 21837 / 10573<br>784 |
| $\Delta\rho_{\text{max}}, \Delta\rho_{\text{min}} / \text{e \AA}^{-3}$ | 0.172; −0.183      | 1.148; −0.951      | 1.304; −0.581        |
| $R[F^2 > 4\sigma(F^2)]$                                                | 0.062              | 0.039              | 0.037                |
| $wR(F^2)$                                                              | 0.140              | 0.092              | 0.069                |
| Goodness of fit, $S$                                                   | 1.069              | 0.865              | 1.304                |

Table S2. Continuation.

|                                                                        | (b4pm) <sub>2</sub> (14tfib)                                                                | (b4pm)(ipfb)                                                    | (b4pm)(135tfib)                                                               |
|------------------------------------------------------------------------|---------------------------------------------------------------------------------------------|-----------------------------------------------------------------|-------------------------------------------------------------------------------|
| Molecular formula                                                      | C <sub>34</sub> H <sub>22</sub> N <sub>2</sub> O <sub>4</sub> I <sub>2</sub> F <sub>4</sub> | C <sub>20</sub> H <sub>11</sub> NO <sub>2</sub> IF <sub>5</sub> | C <sub>20</sub> H <sub>11</sub> NO <sub>2</sub> I <sub>3</sub> F <sub>3</sub> |
| $M_r$                                                                  | 852.36                                                                                      | 519.21                                                          | 735.01                                                                        |
| Crystal system                                                         | triclinic                                                                                   | triclinic                                                       | monoclinic                                                                    |
| Space group                                                            | $P-1$                                                                                       | $P-1$                                                           | $P2_1/c$                                                                      |
| $a / \text{\AA}$                                                       | 6.3741(6)                                                                                   | 6.6164(11)                                                      | 22.1209(22)                                                                   |
| $b / \text{\AA}$                                                       | 11.6659(10)                                                                                 | 10.7159(14)                                                     | 9.3223(8)                                                                     |
| $c / \text{\AA}$                                                       | 12.4722(13)                                                                                 | 14.4376(16)                                                     | 10.6288(10)                                                                   |
| $\alpha / ^\circ$                                                      | 109.136(9)                                                                                  | 73.350(11)                                                      | 90                                                                            |
| $\beta / ^\circ$                                                       | 103.357(8)                                                                                  | 80.309(12)                                                      | 92.355(9)                                                                     |
| $\gamma / ^\circ$                                                      | 104.772(7)                                                                                  | 80.607(13)                                                      | 90                                                                            |
| $V / \text{\AA}^3$                                                     | 795.40(53)                                                                                  | 959.53(39)                                                      | 2190.00(9)                                                                    |
| $Z$                                                                    | 2                                                                                           | 2                                                               | 4                                                                             |
| $\rho_{\text{calc}} / \text{g cm}^{-3}$                                | 1.78                                                                                        | 1.80                                                            | 2.23                                                                          |
| $T / \text{K}$                                                         | 295                                                                                         | 295                                                             | 295                                                                           |
| Crystal size / $\text{mm}^3$                                           | 0.38 x 0.28 x 0.20                                                                          | 0.29 x 0.19 x 0.19                                              | 0.30 x 0.12 x 0.10                                                            |
| $\mu / \text{mm}^{-1}$                                                 | 2.042                                                                                       | 1.732                                                           | 4.323                                                                         |
| $F(000)$                                                               | 414.0                                                                                       | 504.0                                                           | 1360.0                                                                        |
| Refl. collected/unique parameters                                      | 6732 / 3534<br>212                                                                          | 6154 / 3360<br>266                                              | 25188 / 4744<br>266                                                           |
| $\Delta\rho_{\text{max}}, \Delta\rho_{\text{min}} / \text{e \AA}^{-3}$ | 0.441; −0.568                                                                               | 0.677; −0.507                                                   | 1.091; −1.218                                                                 |
| $R[F^2 > 4\sigma(F^2)]$                                                | 0.046                                                                                       | 0.037                                                           | 0.054                                                                         |
| $wR(F^2)$                                                              | 0.090                                                                                       | 0.072                                                           | 0.129                                                                         |
| Goodness of fit, $S$                                                   | 0.965                                                                                       | 0.828                                                           | 1.033                                                                         |

Table S3. CO bond lengths and their differences both in optimized structures of **b4pm** tautomers and **b4pm** molecules present in crystal structures of cocrystals.

| compound                            | $d(\text{CO})_{\text{py}} / \text{\AA}$ | $d(\text{CO})_{\text{bz}} / \text{\AA}$ | $d(\text{CO})_{\text{py}} - d(\text{CO})_{\text{bz}} / \text{\AA}$ |
|-------------------------------------|-----------------------------------------|-----------------------------------------|--------------------------------------------------------------------|
| <b>b4pm</b> _formI <sub>calc</sub>  | 1.246                                   | 1.326                                   | −0.080                                                             |
| <b>b4pm</b> _formII <sub>calc</sub> | 1.328                                   | 1.245                                   | 0.083                                                              |
| (b4pm)(ipfb)                        | 1.300                                   | 1.270                                   | 0.030                                                              |
| (b4pm)(12tfib)                      | 1.311                                   | 1.269                                   | 0.042                                                              |

|                              |       |       |        |
|------------------------------|-------|-------|--------|
|                              | 1.269 | 1.289 | −0.020 |
| (b4pm)(13tfib)               | 1.294 | 1.287 | 0.007  |
|                              | 1.313 | 1.245 | 0.068  |
| (b4pm) <sub>2</sub> (14tfib) | 1.294 | 1.264 | 0.030  |
| (b4pm)(135titfb)             | 1.307 | 1.273 | 0.034  |

**Table S4.** Molar fraction of **b4pm** form I and form II molecules in cocrystals, calculated with respect to data represented in Table S3.

| compound         | $x_I(\text{py})$ | $x_I(\text{bz})$ | $x_{II}(\text{py})$ | $x_{II}(\text{bz})$ | $\langle x_{II} \rangle$ | $\sigma x_{II}$ |
|------------------|------------------|------------------|---------------------|---------------------|--------------------------|-----------------|
| (b4pm)(ipfb)     | 0.34             | 0.31             | 0.66                | 0.69                | 0.68                     | 0.02            |
| (b4pm)(12tfib)   | 0.21             | 0.29             | 0.79                | 0.71                | 0.75                     | 0.06            |
|                  | 0.72             | 0.54             | 0.28                | 0.46                | 0.37                     | 0.13            |
| (b4pm)(13tfib)   | 0.41             | 0.52             | 0.59                | 0.48                | 0.54                     | 0.07            |
|                  | 0.18             | 0.00             | 0.82                | 1.00                | 0.91                     | 0.13            |
| (b4pm)(14tfib)   | 0.41             | 0.23             | 0.59                | 0.77                | 0.68                     | 0.13            |
| (b4pm)(135titfb) | 0.25             | 0.34             | 0.75                | 0.66                | 0.70                     | 0.06            |

### Total Electron Energies and Cartesian Coordinates for Optimised Structures

#### *anti*-b3pm

$E = -745.060197200$  a.u.

| atom | $x$      | $y$      | $z$      |
|------|----------|----------|----------|
| C    | 2.672005 | 1.290418 | −0.01462 |
| C    | 2.552336 | −0.10304 | 0.004369 |
| C    | 3.726405 | −0.85825 | 0.080262 |
| C    | 4.945168 | −0.1979  | 0.143243 |
| H    | 1.794553 | 1.927429 | −0.08982 |
| H    | 3.652993 | −1.94134 | 0.086641 |
| H    | 5.880653 | −0.74338 | 0.205915 |
| C    | 1.246254 | −0.8276  | −0.07024 |
| C    | 0.00177  | −0.09923 | −0.00296 |
| C    | −1.19824 | −0.76095 | −0.09149 |
| C    | −2.5155  | −0.09061 | −0.0297  |
| C    | −2.65371 | 1.281643 | −0.27448 |
| C    | −3.65031 | −0.8532  | 0.272825 |
| C    | −3.90587 | 1.883521 | −0.20277 |
| H    | −1.79121 | 1.879736 | −0.5505  |
| C    | −4.90106 | −0.24663 | 0.35022  |
| H    | −3.53881 | −1.91765 | 0.448502 |
| C    | −5.03182 | 1.121753 | 0.114687 |
| H    | −4.00558 | 2.945585 | −0.40239 |
| H    | −5.77488 | −0.84249 | 0.593669 |
| H    | −6.00802 | 1.59314  | 0.172098 |
| O    | 1.273637 | −2.0698  | −0.18514 |
| O    | −1.27547 | −2.07897 | −0.22377 |
| H    | −0.00205 | 0.967077 | 0.165162 |
| H    | −0.33774 | −2.42722 | −0.23315 |
| C    | 4.945998 | 1.198344 | 0.122605 |
| H    | 5.882647 | 1.748913 | 0.170828 |
| N    | 3.837351 | 1.938663 | 0.04181  |

#### *syn*-b3pm

$E = -745.587770$  a.u.

| atom | <i>x</i>  | <i>y</i> | <i>z</i> |
|------|-----------|----------|----------|
| C    | 2.666541  | 1.289022 | 0.207238 |
| C    | 2.542057  | 0.087979 | 0.016850 |
| C    | 3.704140  | 0.820284 | 0.261195 |
| H    | 1.805456  | 1.902662 | 0.453498 |
| H    | 3.627403  | 1.895154 | 0.403251 |
| C    | 1.246248  | 0.824687 | 0.114727 |
| C    | 0.000983  | 0.097181 | 0.021920 |
| C    | -1.199392 | 0.754031 | 0.131323 |
| C    | -2.516140 | 0.086887 | 0.033020 |
| C    | -2.655012 | 1.294093 | 0.221443 |
| C    | -3.648783 | 0.859574 | 0.250719 |
| C    | -3.904990 | 1.894697 | 0.110962 |
| H    | -1.794030 | 1.900707 | 0.483388 |
| C    | -4.897569 | 0.254649 | 0.366704 |
| H    | -3.537290 | 1.930393 | 0.382504 |
| C    | -5.028583 | 1.122249 | 0.188639 |
| H    | -4.005286 | 2.964115 | 0.266472 |
| H    | -5.769683 | 0.858580 | 0.595984 |
| H    | -6.003175 | 1.592162 | 0.276666 |
| O    | 1.277198  | 2.062149 | 0.261127 |
| O    | -1.277035 | 2.065650 | 0.316656 |
| H    | 0.002678  | 0.959132 | 0.204544 |
| H    | -0.340551 | 2.416313 | 0.333583 |
| C    | 5.014363  | 1.043485 | 0.183590 |
| H    | 6.013447  | 1.464098 | 0.270778 |
| C    | 3.927662  | 1.866797 | 0.108750 |
| H    | 4.072867  | 2.931059 | 0.258973 |
| N    | 4.916816  | 0.277361 | 0.368110 |

**b4pm**

$E = -745.058555310$  a.u.

| atom | <i>x</i> | <i>y</i> | <i>z</i> |
|------|----------|----------|----------|
| C    | 3.94284  | 1.84766  | -0.0944  |
| C    | 2.67394  | 1.2769   | -0.1949  |
| C    | 2.54523  | -0.1007  | -0.0157  |
| C    | 3.69905  | -0.8384  | 0.25051  |
| C    | 4.91575  | -0.1678  | 0.34149  |
| H    | 4.07326  | 2.9176   | -0.2385  |
| H    | 1.82433  | 1.90743  | -0.4339  |
| H    | 3.63237  | -1.9133  | 0.3796   |
| H    | 5.8297   | -0.7159  | 0.55684  |
| C    | 1.23855  | -0.8325  | -0.1169  |
| C    | -0.0011  | -0.1005  | -0.0311  |
| C    | -1.2043  | -0.7563  | -0.1312  |
| C    | -2.5197  | -0.0877  | -0.0331  |
| C    | -2.657   | 1.2934   | -0.2224  |
| C    | -3.6529  | -0.8594  | 0.25158  |
| C    | -3.9066  | 1.89479  | -0.113   |
| H    | -1.7956  | 1.89954  | -0.4839  |

|   |         |         |         |
|---|---------|---------|---------|
| C | -4.9011 | -0.2535 | 0.36689 |
| H | -3.5424 | -1.9302 | 0.3847  |
| C | -5.0307 | 1.12335 | 0.1871  |
| H | -4.0061 | 2.96412 | -0.2693 |
| H | -5.7737 | -0.8564 | 0.59691 |
| H | -6.005  | 1.5941  | 0.27453 |
| N | 5.05015 | 1.15239 | 0.17421 |
| O | 1.27107 | -2.0698 | -0.258  |
| O | -1.2834 | -2.0686 | -0.306  |
| H | 0.00632 | 0.95822 | 0.18265 |
| H | -0.3481 | -2.4214 | -0.3262 |

**ipfb** $E = -7647.918079770$  a.u.

| atom | <i>x</i>  | <i>y</i>  | <i>z</i>  |
|------|-----------|-----------|-----------|
| C    | 0.212692  | 0.000013  | 0.000000  |
| C    | -0.501983 | -1.194340 | -0.000020 |
| C    | -1.891046 | -1.202415 | -0.000076 |
| C    | -2.585866 | 0.000012  | -0.000114 |
| C    | -1.891093 | 1.202421  | -0.000075 |
| C    | -0.501989 | 1.194308  | -0.000017 |
| F    | 0.133111  | -2.363949 | 0.000010  |
| F    | -2.557243 | -2.353703 | -0.000098 |
| F    | -3.913461 | -0.000051 | -0.000165 |
| F    | -2.557199 | 2.353745  | -0.000093 |
| F    | 0.133058  | 2.363963  | 0.000012  |
| I    | 2.298327  | -0.000001 | 0.000091  |

**(b4pm)(ipfb)\_N** $E = -8392.97279020$  a.u.

| atom | <i>x</i>  | <i>y</i> | <i>z</i> |
|------|-----------|----------|----------|
| I    | -2.569597 | 0.349763 | 0.069539 |
| F    | -4.127716 | 2.462054 | 0.013528 |
| F    | -5.264577 | 2.128369 | 0.048212 |
| F    | -8.623655 | 1.138885 | 0.076610 |
| F    | -6.739415 | 3.097119 | 0.075963 |
| F    | -7.871132 | 1.473005 | 0.014365 |
| C    | -6.946660 | 0.513989 | 0.014204 |
| C    | -6.369131 | 1.817903 | 0.045514 |
| C    | -7.333397 | 0.819159 | 0.045903 |
| C    | -5.023908 | 1.473428 | 0.013128 |
| C    | -4.610186 | 0.145364 | 0.018901 |
| C    | -5.595575 | 0.836727 | 0.017620 |
| O    | 4.947851  | 2.613575 | 0.265031 |
| H    | 5.948707  | 2.627858 | 0.274863 |
| O    | 7.335517  | 1.738179 | 0.211338 |
| N    | 0.330674  | 0.890604 | 0.082416 |
| C    | 7.891497  | 0.545578 | 0.001681 |
| C    | 7.517169  | 1.894232 | 0.015977 |
| H    | 6.473898  | 2.185537 | 0.040284 |
| C    | 0.922822  | 2.069219 | 0.296336 |
| H    | 0.263496  | 2.901767 | 0.528694 |



|   |           |          |          |
|---|-----------|----------|----------|
| C | 3.114164  | 1.160665 | 0.063516 |
| C | 2.498509  | 0.071597 | 0.296696 |
| H | 3.069447  | 0.952918 | 0.567271 |
| C | 5.478808  | 0.313557 | 0.034272 |
| H | 5.105414  | 0.686429 | 0.128071 |
| C | 2.300697  | 2.256837 | 0.230039 |
| H | 2.737784  | 3.233700 | 0.401653 |
| C | 9.838098  | 2.547077 | 0.154937 |
| H | 10.592902 | 3.324852 | 0.217935 |
| C | 9.249844  | 0.208726 | 0.055549 |
| H | 9.522187  | 0.841424 | 0.035310 |
| C | 6.907935  | 0.574944 | 0.091474 |
| C | 4.585861  | 1.343667 | 0.128768 |
| C | 10.217706 | 1.203390 | 0.135554 |
| H | 11.268239 | 0.934649 | 0.182070 |
| C | 8.488089  | 2.890623 | 0.092574 |
| H | 8.190625  | 3.934280 | 0.102425 |
| C | 1.112621  | 0.153368 | 0.212256 |
| H | 0.602936  | 1.096564 | 0.395437 |

**(b4pm)(ipfb)\_O** $E = -8392.95640280$  a.u.

| atom | x         | y         | z        |
|------|-----------|-----------|----------|
| 53   | -1.151168 | 0.307271  | 0.563307 |
| 9    | -3.544180 | 1.780708  | 0.109937 |
| 9    | -2.963939 | -2.912587 | 0.006286 |
| 9    | -5.560390 | -3.206609 | 0.636375 |
| 9    | -7.160310 | -1.026286 | 0.898284 |
| 6    | -4.010551 | 0.544658  | 0.069171 |
| 6    | -5.352618 | 0.396994  | 0.395622 |
| 6    | -3.717800 | -1.819925 | 0.125860 |
| 6    | -3.170099 | -0.555732 | 0.071857 |
| 6    | -5.057853 | -1.987397 | 0.451765 |
| 6    | -5.876832 | -0.874514 | 0.587026 |
| 8    | 3.643237  | -1.592246 | 0.912805 |
| 1    | 2.754863  | -1.210955 | 1.166583 |
| 6    | 4.314897  | -0.648165 | 0.271956 |
| 8    | 1.733066  | 0.089203  | 1.105665 |
| 6    | 5.675282  | -1.057173 | 0.136740 |
| 6    | 6.464080  | -0.264262 | 0.981577 |
| 1    | 6.085255  | 0.673715  | 1.373137 |
| 6    | 3.770639  | 0.594506  | 0.031898 |
| 1    | 4.365132  | 1.361730  | 0.442264 |
| 6    | 2.441426  | 0.907020  | 0.471863 |
| 6    | 1.867577  | 2.258149  | 0.185801 |
| 6    | 2.233004  | 3.013409  | 0.929037 |
| 1    | 2.959134  | 2.649729  | 1.649271 |
| 6    | 1.608510  | 4.243750  | 1.132048 |
| 1    | 1.861841  | 4.848185  | 1.999534 |
| 6    | 6.181188  | -2.277505 | 0.329809 |
| 1    | 5.565942  | -2.892094 | 0.977130 |

|   |           |           |          |
|---|-----------|-----------|----------|
| 6 | 0.345922  | 4.020240  | 0.755436 |
| 1 | -0.408699 | 4.450056  | 1.409188 |
| 6 | 0.896857  | 2.774219  | 1.044374 |
| 1 | 0.586837  | 2.213738  | 1.920095 |
| 6 | 7.739018  | -0.682638 | 1.346210 |
| 1 | 8.341552  | -0.064390 | 2.003590 |
| 6 | 7.458545  | -2.692256 | 0.035525 |
| 1 | 7.843630  | -3.637682 | 0.332526 |
| 9 | -6.137702 | 1.464803  | 0.524768 |
| 6 | 8.240082  | -1.896788 | 0.872766 |
| 1 | 9.235249  | -2.221521 | 1.159836 |
| 7 | 0.685970  | 4.751340  | 0.310971 |

**(b4pm)(ipfb)\_OH** $E = -8392.93993320$  a.u.

| atom | x         | y        | z        |
|------|-----------|----------|----------|
| I    | 1.111892  | 0.184696 | 0.626435 |
| F    | 2.572377  | 0.016439 | 2.229177 |
| F    | 3.754401  | 1.081785 | 2.216579 |
| F    | 6.291244  | 1.493220 | 1.429454 |
| F    | 6.985581  | 1.158801 | 1.176766 |
| C    | 3.463221  | 0.353434 | 1.309952 |
| C    | 4.772955  | 0.566585 | 1.720590 |
| C    | 4.058692  | 0.907332 | 0.931405 |
| C    | 3.082776  | 0.518195 | 0.018719 |
| C    | 5.373283  | 1.124397 | 0.538528 |
| C    | 5.730259  | 0.953101 | 0.792281 |
| O    | -3.659444 | 1.461242 | 1.272492 |
| C    | -4.229371 | 0.713732 | 0.454561 |
| C    | -5.519587 | 1.184337 | 0.147391 |
| C    | -6.120487 | 0.586722 | 1.255493 |
| H    | -5.678201 | 0.264530 | 1.761750 |
| C    | -3.687860 | 0.576963 | 0.098536 |
| H    | -4.239133 | 1.249888 | 0.542553 |
| C    | -2.501996 | 0.999857 | 0.641723 |
| C    | -1.873306 | 2.303006 | 0.350451 |
| C    | -2.108312 | 2.970743 | 0.857593 |
| H    | -2.742709 | 2.519905 | 1.614727 |
| C    | -1.491759 | 4.192001 | 1.110858 |
| H    | -1.665885 | 4.698430 | 2.054646 |
| C    | -6.145308 | 2.294173 | 0.421061 |
| H    | -5.695014 | 2.786138 | 1.276430 |
| C    | -0.398983 | 4.091366 | 1.042910 |
| H    | 0.267232  | 4.525325 | 1.781425 |
| C    | -1.008139 | 2.866222 | 1.297090 |
| H    | -0.826169 | 2.343134 | 2.230451 |
| C    | -7.314428 | 1.124001 | 1.737270 |
| H    | -7.800653 | 0.682706 | 2.603960 |
| C    | -7.340265 | 2.744837 | 0.132904 |
| H    | -7.852965 | 3.603534 | 0.293470 |
| F    | 5.114519  | 0.401645 | 2.996818 |

|   |           |          |          |
|---|-----------|----------|----------|
| O | -1.813944 | 0.255001 | 1.507449 |
| H | -2.348157 | 0.583448 | 1.659463 |
| N | -7.925758 | 2.178917 | 1.193938 |
| C | -0.639207 | 4.755599 | 0.159947 |
| H | -0.157415 | 5.707454 | 0.360280 |

**(anti-b3pm)(ipfb)\_N** $E = -8392.9907770$  a.u.

| atom | <i>x</i> | <i>y</i> | <i>z</i>  |
|------|----------|----------|-----------|
| C    | 1.756905 | 1.989122 | 0.020614  |
| C    | 3.021678 | 2.579204 | 0.072835  |
| C    | 3.096925 | 3.972956 | 0.004760  |
| C    | 1.926093 | 4.705720 | -0.134802 |
| H    | 1.631862 | 0.911726 | 0.103565  |
| H    | 4.071680 | 4.447366 | 0.064747  |
| H    | 1.940782 | 5.788212 | -0.198151 |
| C    | 4.292077 | 1.802657 | 0.227150  |
| C    | 4.298897 | 0.377698 | 0.013967  |
| C    | 5.458906 | 0.343456 | 0.171289  |
| C    | 5.558609 | 1.803664 | -0.037004 |
| C    | 4.422402 | 2.623450 | -0.054002 |
| C    | 6.824113 | 2.376450 | -0.215160 |
| C    | 4.550328 | 3.992856 | -0.261536 |
| H    | 3.437536 | 2.202316 | 0.120540  |
| C    | 6.947973 | 3.746472 | -0.427987 |
| H    | 7.700821 | 1.738614 | -0.189769 |
| C    | 5.812902 | 4.556738 | -0.453321 |
| H    | 3.666018 | 4.621703 | -0.265350 |
| H    | 7.931087 | 4.182993 | -0.572049 |
| H    | 5.910836 | 5.625635 | -0.615311 |
| O    | 5.324096 | 2.435031 | 0.528608  |
| O    | 6.605753 | 0.228516 | 0.510830  |
| H    | 3.408395 | 0.128010 | -0.329002 |
| H    | 6.432567 | 1.209639 | 0.598010  |
| C    | 0.714148 | 4.017816 | -0.188329 |
| H    | 0.226292 | 4.552644 | -0.297529 |
| N    | 0.624983 | 2.686832 | -0.105185 |
| C    | 5.952284 | 0.458633 | -0.118279 |
| C    | 5.806196 | 1.821901 | 0.100520  |
| C    | 4.538132 | 2.362019 | 0.269196  |
| C    | 3.425897 | 1.531393 | 0.218316  |
| C    | 3.545340 | 0.162402 | 0.001123  |
| C    | 4.826426 | 0.354113 | -0.166030 |
| I    | 1.852325 | 1.079088 | -0.064519 |
| F    | 2.224812 | 2.088106 | 0.386051  |
| F    | 4.396310 | 3.670131 | 0.477418  |
| F    | 6.877121 | 2.608147 | 0.147585  |
| F    | 7.167992 | 0.059829 | -0.281870 |
| F    | 5.008414 | 1.657967 | -0.377996 |

**(syn-b3pm)(ipfb)** $E = -8392.987287660$  a.u.

---

| atom | x         | y        | z         |
|------|-----------|----------|-----------|
| C    | -5.076389 | 2.228301 | 0.192224  |
| C    | -2.778406 | 0.865531 | -0.144772 |
| C    | -1.436598 | 0.485384 | -0.270546 |
| H    | -4.094345 | 2.587564 | -0.082143 |
| H    | -1.176467 | 0.569226 | -0.228652 |
| C    | -3.796551 | 0.214278 | 0.052767  |
| C    | -5.203691 | 0.099679 | 0.009061  |
| C    | -6.140962 | 0.884727 | 0.213120  |
| C    | -7.600764 | 0.649802 | 0.184404  |
| C    | -8.143384 | 0.626926 | 0.379417  |
| C    | -8.456163 | 1.736566 | -0.033280 |
| C    | -9.521390 | 0.814700 | 0.342469  |
| H    | -7.494921 | 1.470923 | 0.592854  |
| C    | -9.834061 | 1.543831 | -0.077262 |
| H    | -8.030364 | 2.724613 | -0.169926 |
| C    | 10.369250 | 0.269322 | 0.109016  |
| H    | -9.935838 | 1.804532 | 0.504461  |
| H    | 10.491519 | 2.388857 | -0.254744 |
| H    | 11.444137 | 0.120710 | 0.080217  |
| O    | -3.385832 | 1.374798 | 0.248358  |
| O    | -5.807612 | 2.147834 | 0.436703  |
| H    | -5.540848 | 1.095602 | -0.237308 |
| H    | -4.808847 | 2.198877 | 0.413298  |
| C    | -0.740645 | 2.656468 | -0.483528 |
| H    | 0.097606  | 3.336989 | -0.615056 |
| C    | 6.116699  | 1.818050 | -0.085920 |
| C    | 7.080285  | 0.881193 | 0.261918  |
| C    | 6.714169  | 0.442366 | 0.466175  |
| C    | 5.384501  | 0.817155 | 0.321679  |
| C    | 4.399945  | 0.102172 | -0.026057 |
| C    | 4.792511  | 1.422199 | -0.226179 |
| I    | 2.393041  | 0.481473 | -0.236952 |
| F    | 5.073789  | 2.097987 | 0.528470  |
| F    | 7.638407  | 1.342783 | 0.798456  |
| F    | 8.350640  | 1.250140 | 0.398461  |
| F    | 6.467080  | 3.087918 | -0.283325 |
| F    | 3.897097  | 2.352234 | -0.560673 |
| N    | -0.438814 | 1.353568 | -0.438387 |
| C    | -2.040600 | 3.141045 | -0.364891 |
| H    | -2.230917 | 4.207885 | -0.401045 |

---
